# Supplementary material
Source: MDPI journal article supplement (https://www.mdpi.com/1424-8247/15/12/1517)
Supplement: s1 [file s1]

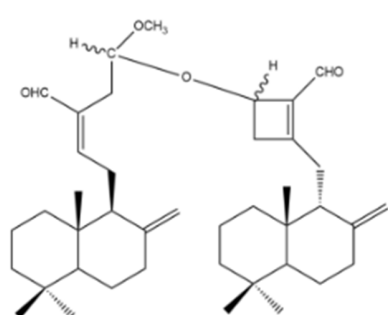

1

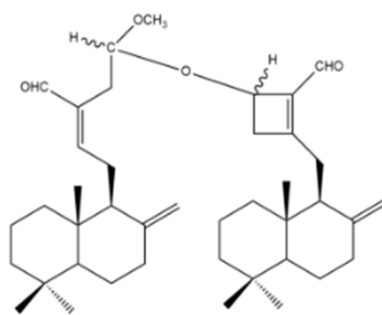

2

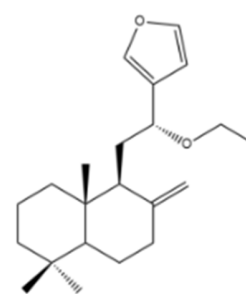

3

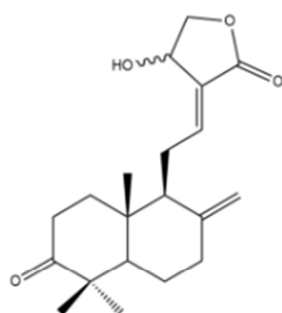

4

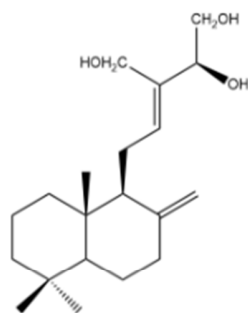

5

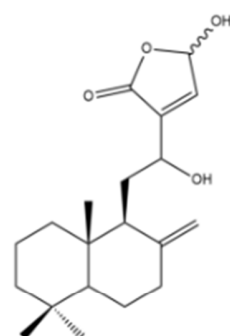

6

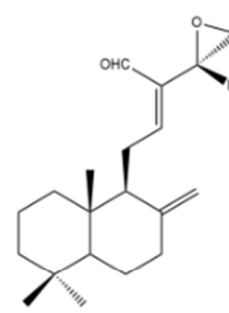

7

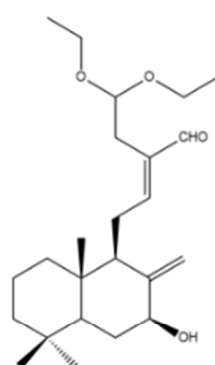

8

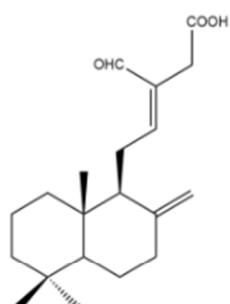

9

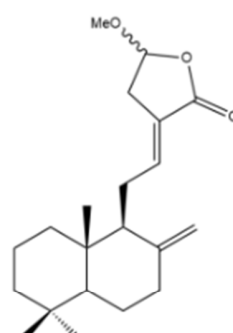

10

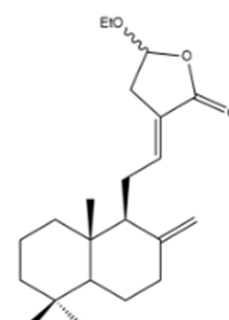

11

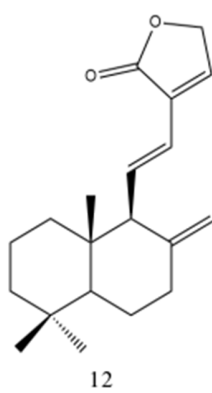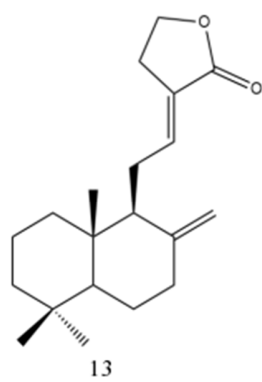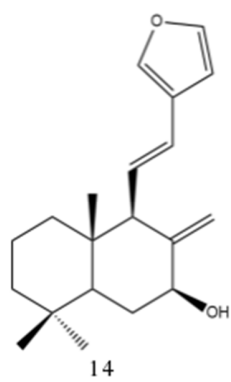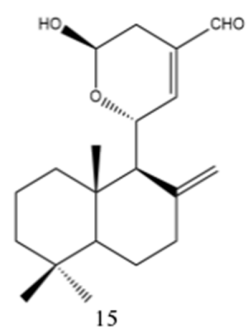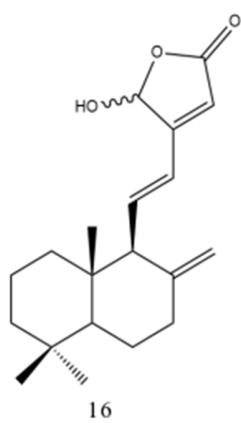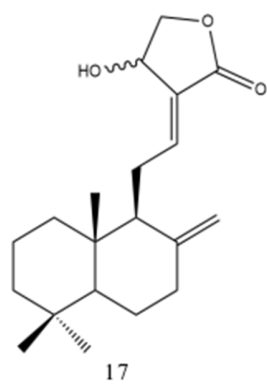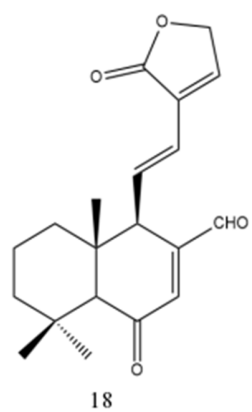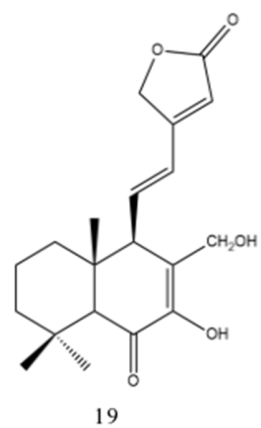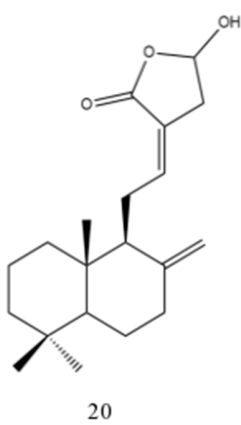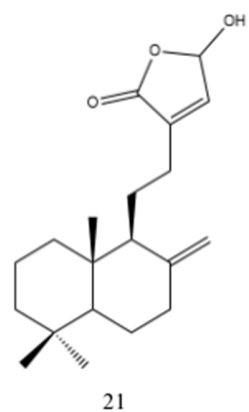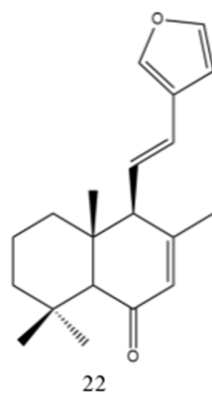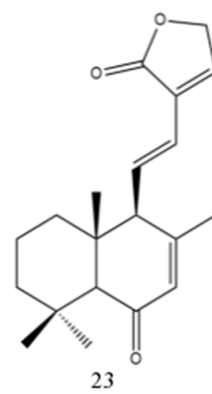

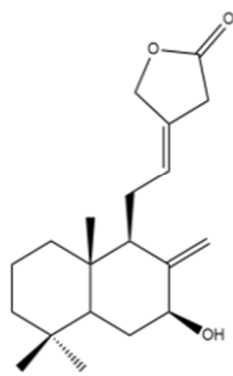

24

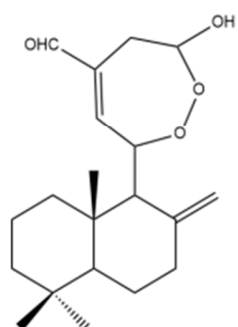

25

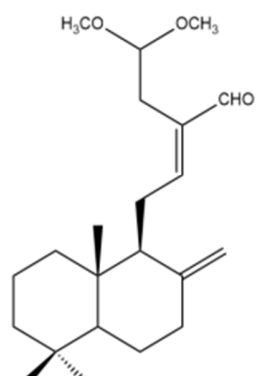

26

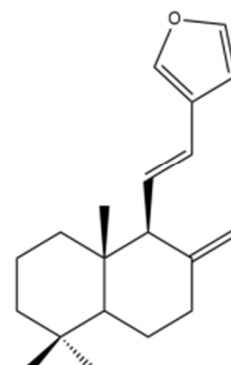

27

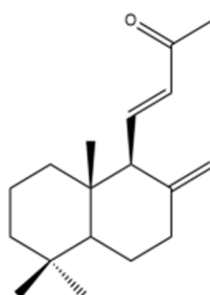

28

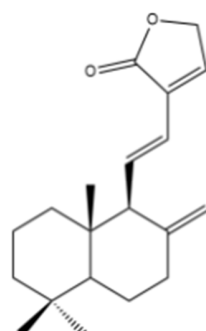

29

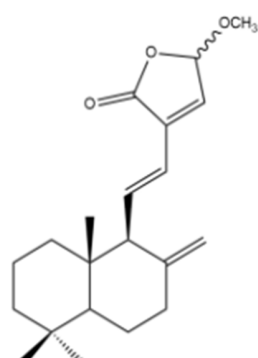

30

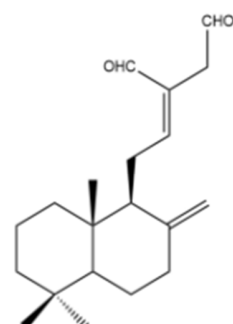

31

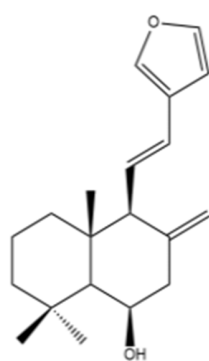

32

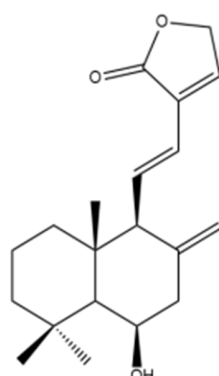

33

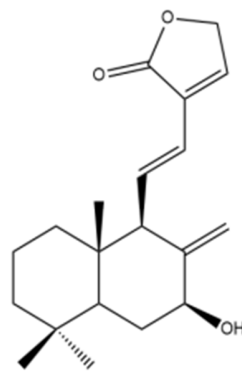

34

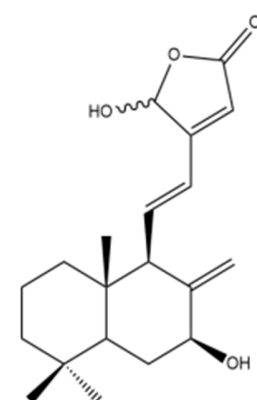

35

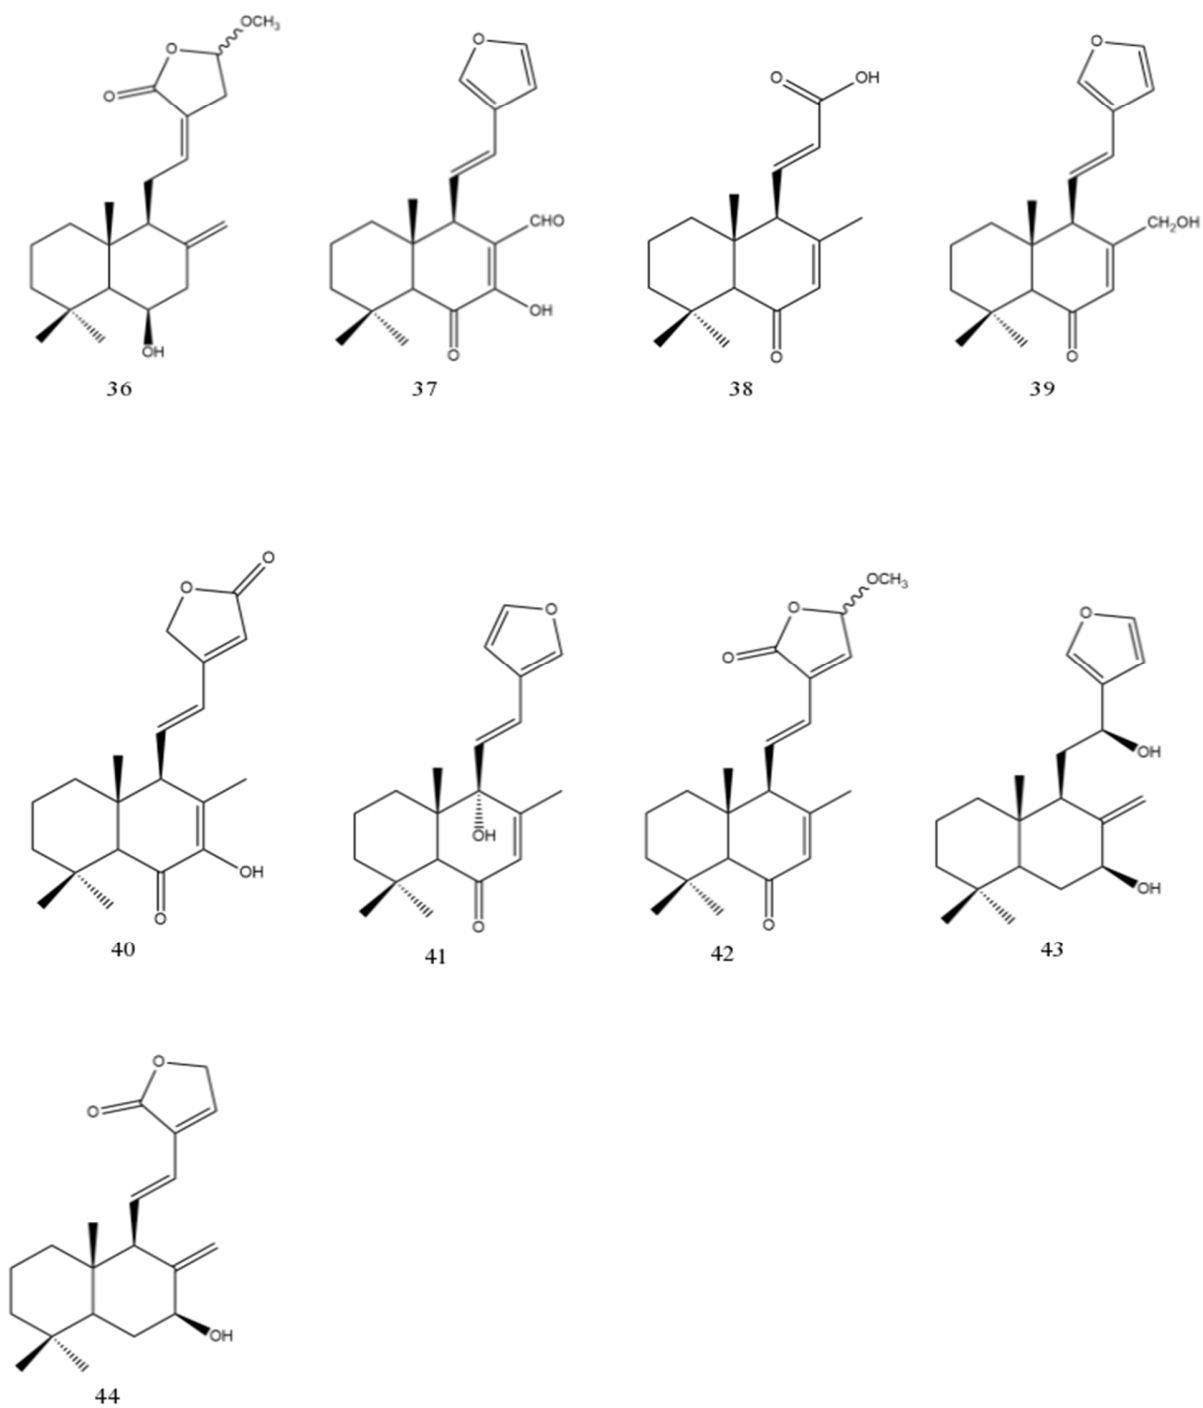

**Figure S1.** Cytotoxic labdane type diterpenes from the Zingiberaceae

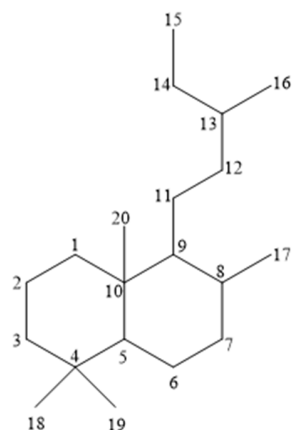

**Figure S2.** Labdane framework

**Table S1.** Extraction, isolation and characterisation of cytotoxic labdane type diterpenes from the Zingiberaceae

| Species                          | Part of the species investigated | Method of extraction                                                                   | Method of isolation                                    | Method of characterisation                     | Name of labdane type diterpenes                                        | Reference |
|----------------------------------|----------------------------------|----------------------------------------------------------------------------------------|--------------------------------------------------------|------------------------------------------------|------------------------------------------------------------------------|-----------|
| <i>Alpinia calcarata</i> Rosc.   | Rhizomes                         | Extracted with methanol                                                                | Column chromatography (silica gel)                     | IR, UV, HRFABMS, 1D and 2D NMR                 | Calcaratarin D (1)                                                     | [30]      |
|                                  |                                  | Methanolic extract was partitioned with ethyl acetate                                  | Preparative TLC<br>Preparative HPLC                    |                                                | Calcaratarin E (2)                                                     |           |
| <i>Alpinia intermedia</i> Gagnep | Leaves                           | Refluxed with 95% ethanol<br><br>Aqueous ethanolic extract was partitioned with hexane | Column chromatography (silica gel or flash silica gel) | GC-MS, 1D and 2D NMR NMR, Single Crystal X-Ray | Intermedin A (3)                                                       | [31]      |
| <i>Amomum maximum</i> Roxb       | Roots                            | Extracted with 95% ethanol<br><br>Aqueous ethanolic extract was partitioned with       | Column chromatography (silica gel/Sephadex LH-20/ODS)  | IR, UV, HR-ESI-MS, <sup>1</sup> H and 2D NMR   | Amomax C (4)<br><br>(12Z,14R)-labda-8(17),12- diene-14,15,16-triol (5) | [32]      |

|                                                             |          |                                                                                                     |                                    |                                              |                                                                                                                                                                                                                                                                                                                                                                                                    |      |
|-------------------------------------------------------------|----------|-----------------------------------------------------------------------------------------------------|------------------------------------|----------------------------------------------|----------------------------------------------------------------------------------------------------------------------------------------------------------------------------------------------------------------------------------------------------------------------------------------------------------------------------------------------------------------------------------------------------|------|
|                                                             |          | dichloromethane                                                                                     | Preparative HPLC (RP-C18 column)   |                                              |                                                                                                                                                                                                                                                                                                                                                                                                    |      |
| <i>Curcuma mangga</i><br>Val.van Zip                        | Rhizomes | Extracted with acetone<br><br>Acetone extract was partitioned with hexane followed by ethyl acetate | Column chromatography (silica gel) | IR, UV, HREIMS, <sup>1</sup> H and 2D NMR    | Zerumin B ( <b>6</b> )                                                                                                                                                                                                                                                                                                                                                                             | [33] |
| <i>Curcuma mutabilis</i><br>Škorničk., M. Sabu & Prasanthk. | Rhizomes | Extracted with petroleum ether                                                                      | Column chromatography (silica gel) | IR, HR-ESI-MS, <sup>1</sup> H and 2D NMR     | ( <i>E</i> )-14,15-epoxylabda-8(17),12-dien-16-al (Cm epoxide) ( <b>7</b> )                                                                                                                                                                                                                                                                                                                        | [34] |
| <i>Hedychium coronarium</i> J. Koenig                       | Rhizomes | Extracted with 95% EtOH<br><br>Aqueous ethanolic extract was partitioned with ethyl acetate         | Column chromatography (silica gel) | IR, UV, HR-ESI-MS, <sup>1</sup> H and 2D NMR | Hedycoronal A ( <b>8</b> )<br><br>Hedycoronal B ( <b>9</b> )<br><br>Coronararin D methyl ether ( <b>10</b> )<br><br>Coronararin D ethyl ether ( <b>11</b> )<br><br>Labda-8(17),11,13-trien-15(16)-olide ( <b>12</b> )<br><br>(12 <i>E</i> )-Labda-8(17),12-dien-15(16)-olide ( <b>13</b> )<br><br>Coronararin A ( <b>14</b> )<br><br>15-Hydroxy-11,15-epoxylabda-8(17),12-dien-16-al ( <b>15</b> ) | [35] |

|                                       |              |                                                                           |                                                                                     |                                                                |                                                                                                                                                                                                                                                                                                                                               |                                                             |
|---------------------------------------|--------------|---------------------------------------------------------------------------|-------------------------------------------------------------------------------------|----------------------------------------------------------------|-----------------------------------------------------------------------------------------------------------------------------------------------------------------------------------------------------------------------------------------------------------------------------------------------------------------------------------------------|-------------------------------------------------------------|
|                                       |              |                                                                           |                                                                                     |                                                                |                                                                                                                                                                                                                                                                                                                                               | 16-Hydroxylabda-8(17),11,13-trien-15,16-olide ( <b>16</b> ) |
|                                       |              |                                                                           |                                                                                     |                                                                |                                                                                                                                                                                                                                                                                                                                               | Isocoronarin D ( <b>17</b> )                                |
| <i>Hedychium coronarium</i> J. Koenig | Rhizomes     | Soxhlet extraction with hexane                                            | Column chromatography (silica gel)<br><br>Preparative TLC                           | IR, HR-ESI-MS, <sup>1</sup> H and <sup>13</sup> C NMR          | Coronarin D methyl ether ( <b>10</b> )<br><br>6-oxo-7,11,13-labdatrien-17-al-16,15-olide ( <b>18</b> )<br><br>7,17-dihydroxy-6-oxo-7,11,13-labdatrien-16,15-olide ( <b>19</b> )<br><br>Coronarin D ( <b>20</b> )<br><br>Coronarin C ( <b>21</b> )<br><br>Hedychenone ( <b>22</b> )<br><br>6-oxo-7,11,13-labdatriene-16,15-olide ( <b>23</b> ) | [36]                                                        |
|                                       |              |                                                                           |                                                                                     |                                                                |                                                                                                                                                                                                                                                                                                                                               | Pacovatinin A ( <b>24</b> )                                 |
| <i>Hedychium coronarium</i> J. Koenig | Rhizomes     | Macerated with dichloromethane                                            | Vacuum liquid chromatography (silica gel)<br><br>Column chromatography (silica gel) | IR, UV, HRMS (ESI-TOF), <sup>1</sup> H and <sup>13</sup> C NMR | Isocoronarin D ( <b>17</b> )<br><br>Coronarin D ( <b>20</b> )<br><br>Coronarin B ( <b>25</b> )                                                                                                                                                                                                                                                | [37]                                                        |
| <i>Hedychium coronarium</i> J. Koenig | Aerial parts | Extracted with MeOH<br><br>Methanolic extract was partitioned with hexane | Column chromatography (silica gel)<br><br>Preparative TLC                           | IR, UV, HR-ESI-MS, <sup>1</sup> H and <sup>13</sup> C NMR      | Coronarin A ( <b>14</b> )<br><br>Calcaratarin A ( <b>26</b> )                                                                                                                                                                                                                                                                                 | [38]                                                        |

|                                                       |          |                                                                                          |                                                   |                                   |                                                                                                                                                                                                                                                                                                                                                                                                        |      |
|-------------------------------------------------------|----------|------------------------------------------------------------------------------------------|---------------------------------------------------|-----------------------------------|--------------------------------------------------------------------------------------------------------------------------------------------------------------------------------------------------------------------------------------------------------------------------------------------------------------------------------------------------------------------------------------------------------|------|
| <i>Hedychium ellipticum</i><br>Buch-Ham. ex Sm.       | Rhizomes | Extracted with Hexane followed by dichloromethane                                        | Column chromatography (silica gel/Sephadex LH-20) | IR, HREIMS (Q-TOF), 1D and 2D NMR | Zerumin B ( <b>6</b> )<br><br>16-Hydroxylabda-8(17),11,13-trien-15,16-olide ( <b>16</b> )<br><br>Coronarín D ( <b>20</b> )<br><br>Coronarín E ( <b>27</b> )<br><br>( <i>E</i> )-15,16-Bisnorlabda-8(17),11-dien-13-one ( <b>28</b> )<br><br>Villosin ( <b>29</b> )<br><br>15-Methoxylabda-8(17),11,13-trien-15,16-olide ( <b>30</b> )<br><br>( <i>E</i> )-labda-8(17),12-dien-15,16-dial ( <b>31</b> ) | [39] |
| <i>Hedychium forrestii</i> Tong.                      | Rhizomes | Extracted with hot 95% ethanol<br><br>Ethanol extract was partitioned with ethyl acetate | Column chromatography (silica gel)                | IR, HR-EI-MS, 1D and 2D NMR       | Yunnan coronarin A ( <b>32</b> )<br><br>Yunnan coronarin B ( <b>33</b> )                                                                                                                                                                                                                                                                                                                               | [40] |
| <i>Hedychium gardnerianum</i><br>Sheppard ex Ker Gawl | Rhizomes | Successively extracted with hexane and dichloromethane                                   | Column chromatography (silica gel)                | IR, EIMS, 1D and 2D NMR           | Coronarín A ( <b>14</b> )<br><br>Coronarín E ( <b>27</b> )<br><br>Villosin ( <b>29</b> )<br><br>Yunnan coronarin A ( <b>32</b> )<br><br>Yunnan coronarin B ( <b>33</b> )<br><br>Hedyforrestin B ( <b>34</b> )                                                                                                                                                                                          | [41] |

|                                              |          |                                                                               |                                                                                 |                                  |                                                                                            |
|----------------------------------------------|----------|-------------------------------------------------------------------------------|---------------------------------------------------------------------------------|----------------------------------|--------------------------------------------------------------------------------------------|
| Hedyforrestin C (35)                         |          |                                                                               |                                                                                 |                                  |                                                                                            |
| <i>Hedychium longipetalum</i> X. Hu & N. Liu | Rhizomes | N/A                                                                           | N/A                                                                             | IR, UV, HR-ESI-MS, 1D and 2D NMR | Yunnancoronarin A (32) [42]                                                                |
|                                              |          |                                                                               |                                                                                 |                                  | Hedyforrestin B (34)                                                                       |
|                                              |          |                                                                               |                                                                                 |                                  | Hedyforrestin C (35)                                                                       |
| Hedylongnoid C (36)                          |          |                                                                               |                                                                                 |                                  |                                                                                            |
| <i>Hedychium spicatum</i> Buch.-Ham. ex Sm.  | Rhizomes | Extracted with dichloromethane/methanol (1:1)                                 | Column chromatography (silica gel)<br><br>Preparative HPLC (C18 column)         | IR, HR-ESI-MS, 1D and 2D NMR     | Coronarin E (27) [43]                                                                      |
|                                              |          |                                                                               |                                                                                 |                                  | 7-hydroxy,15,16-epoxy-17-al-7,11,13(16),14-labdatetraene-6-one (7-hydroxy hedichinal) (37) |
|                                              |          |                                                                               |                                                                                 |                                  | 14,15,16-trinor-7,11-labdadien-13-oicacid (spicatanoic acid) (38)                          |
|                                              |          |                                                                               |                                                                                 |                                  | Yunnancoronarin D (39)                                                                     |
| <i>Hedychium spicatum</i> Buch.-Ham. ex Sm.  | Rhizomes | Soxhlet extraction with chloroform                                            | Column chromatography (silica gel)                                              | IR, HR-ESI-MS, 1D and 2D NMR     | Yunnancoronarin A (32) [44]                                                                |
|                                              |          |                                                                               |                                                                                 |                                  | 7-hydroxy,6-oxo-7,11,13-labdatrien-16,15-olide (hedychilactone D) (40)                     |
|                                              |          |                                                                               |                                                                                 |                                  | 9-hydroxy,15,16-epoxy-7,11,13(16)14-labdatetraen-6-one (9-hydroxy hedychenone) (41)        |
| <i>Hedychium yunnanense</i> Gagnep.          | Rhizomes | Macerated with ethanol under reflux<br><br>Ethanollic extract was partitioned | Column chromatography (Silica gel/MCI gel)<br><br>Semipreparative HPLC (RP-C18) | IR, UV, HR-ESI-MS, 1D and 2D NMR | Hedychenone (22) [45]                                                                      |
|                                              |          |                                                                               |                                                                                 |                                  | Villosin (29)                                                                              |
|                                              |          |                                                                               |                                                                                 |                                  | Hedychenoid B (42)                                                                         |

|                           |          |                                                                                |                                    |                                  |                                                                                     |      |
|---------------------------|----------|--------------------------------------------------------------------------------|------------------------------------|----------------------------------|-------------------------------------------------------------------------------------|------|
| with ethyl acetate        |          |                                                                                |                                    |                                  |                                                                                     |      |
| <i>Roscoeapurplea</i> Sm. | Rhizomes | Extracted with methanol                                                        | Column chromatography (Silica gel) | IR, UV, HR-ESI-MS, 1D and 2D NMR | Coronarin A ( <b>14</b> )<br>Coronarin K ( <b>43</b> )<br>Coronarin L ( <b>44</b> ) | [46] |
|                           |          | Methanolic extract was partitioned with petroleum ether followed by chloroform |                                    |                                  |                                                                                     |      |
